# Supplementary material for: A copper-based metal–organic framework/graphene nanocomposite for the sensitive and stable electrochemical detection of DNA bases
Source: Royal Society of Chemistry journal article supplement (doi:10.1039/c9an02398d), 2020-01-01
Supplement: c9an02398d1.pdf [file c9an02398d1.pdf]

**Fig. S1 (C)**

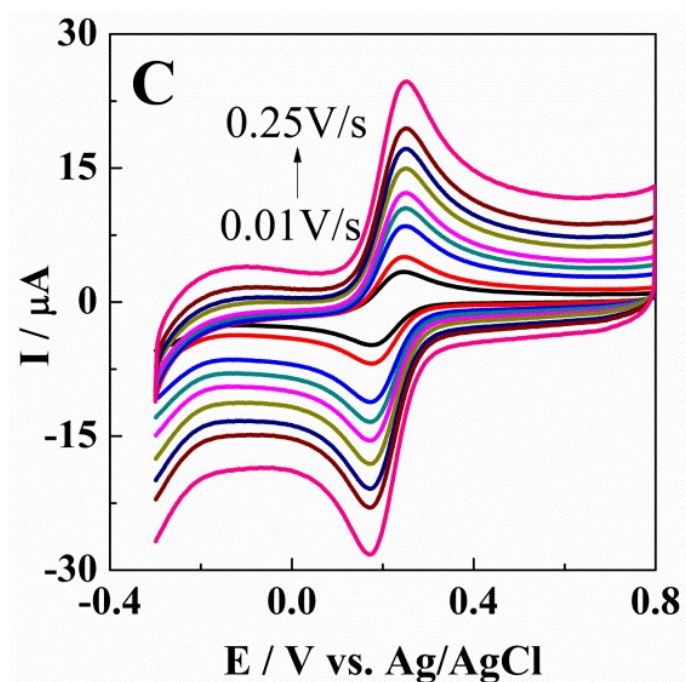

Fig. S1. CVs of (A)GCE,(B) ERGO/GCE,(C) Cu-MOF/ERGO/GCE in 1mM  $[\text{Fe}(\text{CN})_6]^{3-/4-}$  containing 0.1M KCl with different scan rates(from inner to outer are 10,20,50,70,90,120,150,180, 250  $\text{mVs}^{-1}$ ,respectively.).

**Fig. S2 (A) and Fig. S2 (B)**

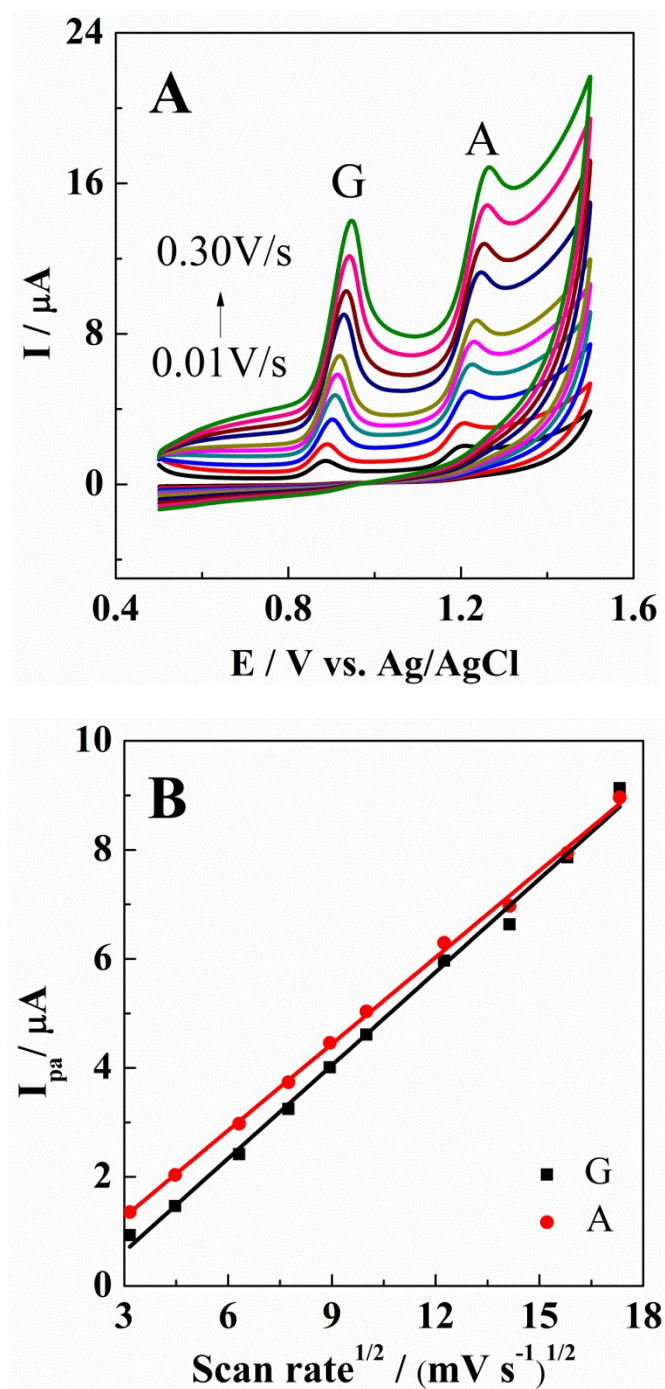

Fig. S2. (A)CVs of the mixture containing 200  $\mu\text{M}$  adenine and 100  $\mu\text{M}$  guanine on Cu-MOF/ERGO/GCE with different scan rates(from inner to outer are 10,20,40,60,80,100,150,200,250,300 $\text{mVs}^{-1}$ ,respectively.) in 0.1 M PBS (pH 4.0). (B) Corresponding plots of the anodic peak currents ( $I_{\text{pa}}$ ) versus square roots of scan rate.
